# Supplementary material
Source: HighWire-hosted journal article supplement (https://ez-admanager.com/highwire/filestream/134666/field_highwire_adjunct_files/0/1049.pdf)
Supplement: 1049.pdf [file 1049.pdf]

## Rasmussen encephalitis and comorbid autoimmune diseases: A window into disease mechanism?

التهاب الدماغ بحسب راسميوسن وعلاقته بأمراض المناعة الذاتية. نافذة على الآلية الإمبراضية.

**الهدف:** محاولة توصيف ارتباط محتمل ما بين أمراض المناعة الذاتية والتهاب الدماغ بحسب راسميوسن مع مناقشة الأسباب المرضية التي قد تكون مشتركة بينهما.

**طريقة البحث:** قمنا بمتابعة أربع حالات مصابة بالتهاب الدماغ بحسب راسميوسن والتي تم اكتشاف أمراض مناعة ذاتية أخرى فيها لاحقاً ثم قمنا بعمل مراجعة للأدب الطبي لعوامل الخطر المشتركة المحتملة.

**النتائج:** في كل الحالات الأربع المصابة بالتهاب الدماغ بحسب راسميوسن تم تشخيص أمراض مناعة ذاتية مرافقة كالتالي: التهاب الغدة الدرقية لهاشيموتو، التهاب القولون القرصي، داء كرون ومرض الذئبة الحمامية. قمنا بمناقشة احتمال وجود عوامل مسببة مشتركة.

**الخلاصة:** إن الارتباط ما بين الإصابة بمرض التهاب الدماغ بحسب راسميوسن - وهو مرض نادر نسبياً - مع أمراض مناعة ذاتية أخرى يزيد من احتمالية اشتراك هذه الأمراض في آلية تجعل الجسم أكثر عرضة للإصابة؛ هذه الآلية قد تشمل عوامل خطر وراثية مناعية و/أو عوامل خطر بيئية.

**Objective:** To describe a potential association between comorbid autoimmune disease and Rasmussen encephalitis (RE) and discuss potential insights into underlying RE pathogenesis.

**Methods:** We report a case series of 4 patients with RE in whom a comorbid autoimmune disease was subsequently diagnosed and review the literature on possible common susceptibility factors.

**Results:** In 4 patients who presented with typical clinical features of RE, a comorbid autoimmune disease was subsequently diagnosed: Hashimoto thyroiditis, ulcerative colitis, Crohn disease, and systemic lupus erythematosus. We discuss the possible common predisposing factors.

**Conclusions:** The association of RE, a rare entity, with a comorbid autoimmune disease raises the possibility of shared mechanisms of susceptibility, including common immunogenetic and/or environmental risk factors.

**Translator:** Ahmed Bamaga, MBBS, Pediatric Neurology, the Hospital for Sick Children  
Toronto, Ontario, CA

**Translation Reviewer:** Ahmad A Al-Awwad, MD, Department of Neurology, The University of  
Oklahoma Health Sciences Center, Oklahoma City, OK
